# Supplementary material for: Manipulating energy transfer in lanthanide-doped single nanoparticles for highly enhanced upconverting luminescence
Source: Royal Society of Chemistry journal article supplement (doi:10.1039/c7sc01393k), 2017-01-01
Supplement: c7sc01393k1.pdf [file c7sc01393k1.pdf]

## Electronic Supplementary Information (ESI) for Chemical Science

# Manipulating Energy Transfer in Lanthanide-Doped Single Nanoparticle for Highly Enhanced Upconverting Luminescence

Zhu Zhuo,<sup>ab</sup> Yongsheng Liu,<sup>\*a</sup> Dajiu Liu,<sup>a</sup> Ping Huang,<sup>a</sup> Feilong Jiang,<sup>a</sup> Xueyuan Chen,<sup>\*a</sup> and Maochun Hong<sup>\*a</sup>

<sup>a</sup>CAS Key Laboratory of Design and Assembly of Functional Nanostructures, Key Laboratory of Optoelectronic Materials Chemistry and Physics, and State Key Laboratory of Structural Chemistry, Fujian Institute of Research on the Structure of Matter, Chinese Academy of Sciences, Fuzhou, Fujian 350002, China

<sup>b</sup>University of the Chinese Academy of Sciences, Beijing, 100049, China

\*To whom correspondence should be addressed, e-mail: liuysh@fjirsm.ac.cn, hmc@fjirsm.ac.cn, and [xchen@fjirsm.ac.cn](mailto:xchen@fjirsm.ac.cn)

## Supplementary Experimental Section

**Chemicals and Materials.** CF<sub>3</sub>COOH, Ln<sub>2</sub>O<sub>3</sub> (Ln = Sc, Y, Gd, Yb, Er, Ho and Tm), Ln(CH<sub>3</sub>COO)<sub>3</sub>·4H<sub>2</sub>O, CF<sub>3</sub>COOK·H<sub>2</sub>O, oleic acid (OA), oleylamine (OM), and 1-octadecene (ODE) were purchased from Sigma-Aldrich (China). Ln(CF<sub>3</sub>COO)<sub>3</sub>·4H<sub>2</sub>O was prepared as reported in the literature.<sup>1</sup> Polystyrene beads (9.0-9.9 μm) were purchased from Aladdin Reagent Co., Ltd. 1-butanol, dichloromethane, cyclohexane, NaOH, NH<sub>4</sub>F, and ethanol were purchased from Sinopharm Chemical Reagent Co., China. Unless otherwise noted, all the chemical reagents were used as received without further purification.

**General procedure for the synthesis of Yb/X (X = Er, Tm and Ho) pair singly doped KSc<sub>2</sub>F<sub>7</sub> nanorods with different lengths.** Taking the KSc<sub>2</sub>F<sub>7</sub>:Yb20%/Er2% nanorods for example, 0.5 mmol of CF<sub>3</sub>COOK·H<sub>2</sub>O, 0.78 mmol of Sc(CF<sub>3</sub>COO)<sub>3</sub>·4H<sub>2</sub>O, 0.2 mmol of Yb(CF<sub>3</sub>COO)<sub>3</sub>·4H<sub>2</sub>O and 0.02 mmol of Er(CF<sub>3</sub>COO)<sub>3</sub>·4H<sub>2</sub>O were first added to a 250 mL three-neck round-bottom flask containing 15 mL of OA, 10 mL of ODE and 5 mL of OM, and then heated at 150 °C under N<sub>2</sub> flow with constant stirring for 30 min to remove the water from the raw materials. The obtained mixture was heated to 300 °C under N<sub>2</sub> flow with constant stirring and maintained for 30 min to obtain ~150 nm KSc<sub>2</sub>F<sub>7</sub>:Yb/Er seed nanorods. After retrieving 1 mL of reaction mixture for TEM analysis, 10 mL KSc<sub>2</sub>F<sub>7</sub>:Yb/Er precursors were immediately injected into the reaction mixture and ripened at 300 °C for 30 min followed by the similar injection and ripening cycles. The length of the obtained KSc<sub>2</sub>F<sub>7</sub>:Yb/Er nanorods can be finely tuned by adjusting the injection and ripening cycles at 300 °C. After naturally cooling down to room temperature, the obtained KSc<sub>2</sub>F<sub>7</sub>:Yb/Er nanorods were

precipitated by addition of ethanol, collected by centrifugation at 8000 rpm for 5 min, washed with ethanol several times, and finally re-dispersed in cyclohexane.

**General procedure for the synthesis of Yb/Er/Tm/Ho co-doped KSc<sub>2</sub>F<sub>7</sub> nanorods with different lengths:** In a typical procedure, 0.5 mmol of CF<sub>3</sub>COOK·H<sub>2</sub>O, 0.72 mmol of Sc(CF<sub>3</sub>COO)<sub>3</sub>·4H<sub>2</sub>O, 0.2 mmol of Yb(CF<sub>3</sub>COO)<sub>3</sub>·4H<sub>2</sub>O, 0.02 mmol of Er(CF<sub>3</sub>COO)<sub>3</sub>·4H<sub>2</sub>O, 0.05 mmol of Ho(CF<sub>3</sub>COO)<sub>3</sub>·4H<sub>2</sub>O, 0.01 mmol of Tm(CF<sub>3</sub>COO)<sub>3</sub>·4H<sub>2</sub>O were first added to a 250 mL three-neck round-bottom flask containing 15 mL of OA, 10 mL of ODE and 5 mL of OM, and then heated at 150 °C under N<sub>2</sub> flow with constant stirring for 30 min to remove the water from the raw materials. After retrieving 30 mL of reaction mixture as subsequent injected precursors, the remaining mixture was heated to 300 °C under N<sub>2</sub> flow with constant stirring and maintained for 30 min to obtain ~150 nm KSc<sub>2</sub>F<sub>7</sub>:Yb/Tm/Er/Ho nanorods. Thereafter, 10 mL KSc<sub>2</sub>F<sub>7</sub>:Yb/Tm/Er/Ho precursors were immediately injected into the reaction mixture and ripened at 300 °C for 30 min, followed by the similar injection and ripening cycles for several times. The length of the obtained KSc<sub>2</sub>F<sub>7</sub>:Yb/Tm/Er/Ho nanorods can be finely tuned by adjusting the injection and ripening cycles at 300 °C. After naturally cooling down to room temperature, the obtained KSc<sub>2</sub>F<sub>7</sub>:Yb/Tm/Er/Ho nanorods were precipitated by addition of ethanol, collected by centrifugation at 8000 rpm for 5 min, washed with ethanol several times, and finally re-dispersed in cyclohexane.

**General procedure for the preparation of NaGdF<sub>4</sub>:Yb/Er/Tm@NaGdF<sub>4</sub>:Yb/Er/Tm core-shell nanoparticles (NPs).** The synthesis of NaGdF<sub>4</sub>:Yb/Er/Tm@NaGdF<sub>4</sub>:Yb/Er/Tm core-shell NPs was conducted via a successive layer-by-layer injection protocol.<sup>2</sup> In a typical procedure, the NaGdF<sub>4</sub>:Yb/Tm core NPs was first prepared by mixing 0.5 mmol of Ln(CH<sub>3</sub>COO)<sub>3</sub>·4H<sub>2</sub>O (Ln = Gd, Yb, Er and Tm), 4 mL OA and 8 mL ODE in a 100-mL three-neck round-bottom flask followed by heating at 150 °C for 30 min under N<sub>2</sub> flow. After cooling down to 50 °C, 5 mL of methanol solution containing NH<sub>4</sub>F (2 mmol) and NaOH (1.25 mmol) was added and stirred for 30 min. Subsequently, the resulting mixture was heated to 290 °C under N<sub>2</sub> flow and maintained for 30 min to obtain ~10 nm NaGdF<sub>4</sub>:Yb/Er/Tm core NPs. After retrieving 1 mL of reaction mixture for TEM analysis, 2 mL ODE solution containing calculated amount of ~5 nm NaGdF<sub>4</sub>:Yb/Er/Tm sacrificial shell NPs were immediately injected into the reaction mixture and ripened at 290 °C for 15 min followed by the similar injection and ripening cycles. The thickness of the NaGdF<sub>4</sub>:Yb/Er/Tm shell layers can be finely tuned by adjusting the injection and ripening cycles. Injection of shell precursors and ripening cycles were performed to a total of three cycles to yield monodisperse ~15 nm NaGdF<sub>4</sub>:Yb/Er/Tm@NaGdF<sub>4</sub>:Yb/Er/Tm core-shell NPs. The obtained core-shell NPs were precipitated by addition of 30 mL of ethanol, collected by centrifugation, washed with ethanol several times, and finally re-dispersed in cyclohexane.

**General procedure for the preparation of nanorod-tagged polystyrene beads.** In a typical procedure, 100  $\mu\text{L}$  of polystyrene beads (diameter 9-9.9  $\mu\text{m}$ , 5% w/v) were first dispersed in the mixture of 1 mL 1-butanol and 1 mL dichloromethane, and then 500  $\mu\text{L}$  dichloromethane solution containing 20 mg/mL multilayer-structured  $\text{KSc}_2\text{F}_7$  nanorods was added and kept shaking gently at room temperature for 3 h. Thereafter, 4 mL of ethanol was added into the above mixture to stop the swelling of polystyrene beads, and the resulting nanorod-tagged polystyrene beads were collected by centrifugation at 6000 rpm for 5 min, washed with ethanol 3 times and redispersed in ethanol.

**Preparation of water-soluble  $\text{KSc}_2\text{F}_7$  nanorods.** To render the hydrophobic nanorods hydrophilic, we removed the original OA ligands from their surface by acid treatment as previously reported.<sup>2</sup> In a typical process, 20 mg of the as-synthesized OA-capped  $\text{KSc}_2\text{F}_7$  nanorods were dispersed in 30 mL of acidic ethanol solution (pH 1) and ultrasonicated for 30 min to remove the surface ligands. After the reaction, the nanorods were collected by centrifugation at 12000 rpm for 10 min, and further purified by adding an acidic ethanol solution (pH 4). The resulting water-soluble  $\text{KSc}_2\text{F}_7$  nanorods were washed with ethanol and distilled water for several times, and then re-dispersed in distilled water for the following use.

**Inkjet printing or handwriting of multilayer-structured  $\text{KSc}_2\text{F}_7$  nanorods on banknote.** A common ink cartridge of the commercial inkjet printer (HP Deskjet 1112) was washed with ethanol until the ink was completely cleared away. After the vacant cartridge was dried, 1 mL of water solution of water-soluble multilayer-structured  $\text{KSc}_2\text{F}_7$  nanorods (30 mg/mL) was injected into the HP 803 cartridge. Subsequently, the printing was carried out by an inkjet printer connected with a computer, and thus the nanorods were patterned on a piece of A4 paper. The two-dimensional (2D) code and multicolored sketch were printed by using the inkjet printer, while the Arabic numbers of “123456” were handwritten on the A4 paper. The colorful UC luminescence pictures were taken by a Canon 70D camera upon irradiation using a 980-nm diode laser at a power density of  $\sim 200 \text{ W cm}^{-2}$ , where a short pass filter of 750 nm was placed in the front of the camera to filter the 980-nm excitation light.

**Theoretical Analysis for UC Luminescence Lifetime of  $\text{Ln}^{3+}$  Ion.** It is well known that the observed lifetime ( $\tau$ ) for a particular excited state (luminescent level) of  $\text{Ln}^{3+}$  ion is determined by the sum of the inverse of the radiative and nonradiative rates, which can be expressed as:  $\tau^{-1} = W_R + W_{NR}$ , where  $W_R$  and  $W_{NR}$  are the total radiative and nonradiative relaxation rates from the excited state of interest, respectively.<sup>3</sup> The total radiative relaxation rate is mainly evaluated via Einstein spontaneous emission coefficients of  $\text{Ln}^{3+}$  ions, which can be regarded as a constant in a given host material. By contrast, the nonradiative relaxation rate is primarily determined by the magnitude of the energy gap between the luminescent and its next lowest-lying states of  $\text{Ln}^{3+}$  ions, which thereby can be significantly affected by

some factors such as surface defect states of NPs and CR-ETs between different or identical neighbouring  $\text{Ln}^{3+}$  ions that act as the nonradiative relaxation channels of excited states of  $\text{Ln}^{3+}$  ions. For the multilayer-structured  $\text{KSc}_2\text{F}_7$  nanorods we obtained, the inhibition of CR-ETs between the adjacent  $\text{Ln}^{3+}$  ions through adjusting the thickness of pure  $\text{KSc}_2\text{F}_7$  interlayer will certainly decreases the non-radiative relaxation rate ( $W_{\text{NR}}$ ) of the excited states of  $\text{Ln}^{3+}$  ion and thus result in prolonged UC lifetimes. For the multilayer-structured  $\text{KSc}_2\text{F}_7$  nanorods with pure  $\text{KSc}_2\text{F}_7$  interlayer longer than 10.3 nm, the excessive growth of pure  $\text{KSc}_2\text{F}_7$  interlayer will give rise to the decrease of the overall doping concentration of  $\text{Ln}^{3+}$  ions, which can also weaken the CR-ETs probability among  $\text{Ln}^{3+}$  ions, as observed in Yb/Tm co-doped  $\text{NaYF}_4$  nanocrystals by Prof. Jin.<sup>4</sup> As a result, further prolonged UC lifetimes of  $\text{Tm}^{3+}$  and  $\text{Er}^{3+}$  ions were observed in  $\text{Tm@Er@Pure}$  or  $\text{Tm@Tm@Pure}$  nanorods with pure  $\text{KSc}_2\text{F}_7$  interlayer longer than 10.3 nm.

## Supplementary Figures

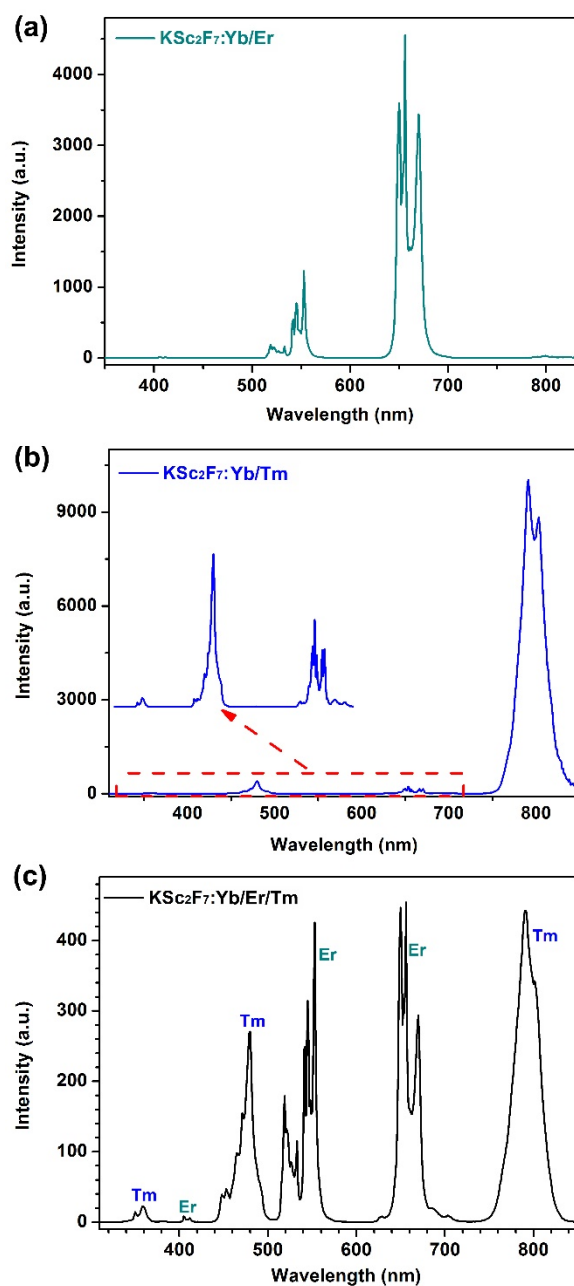

**Fig. S1** Comparison of the UC luminescence intensities for Yb/Er, Yb/Tm and Yb/Er/Tm doped KSc<sub>2</sub>F<sub>7</sub> nanorods, demonstrating the occurrence of the concentration quenching of UC luminescence in the case of multiple Ln ions co-doping. The doping concentration of Yb, Er and Tm were 20, 2 and 1 mol%, respectively. It can be clearly seen that the UC luminescence intensity for Yb/Er/Tm co-doped KSc<sub>2</sub>F<sub>7</sub> nanorods is about one order of magnitude lower than those of Yb/Er or Yb/Tm pair singly doped KSc<sub>2</sub>F<sub>7</sub> nanorods measured under identical experimental conditions, indicating the more severe concentration quenching for Yb/Er/Tm co-doped KSc<sub>2</sub>F<sub>7</sub> nanorods with higher overall doping concentration of Er and Tm ions (3 mol%).

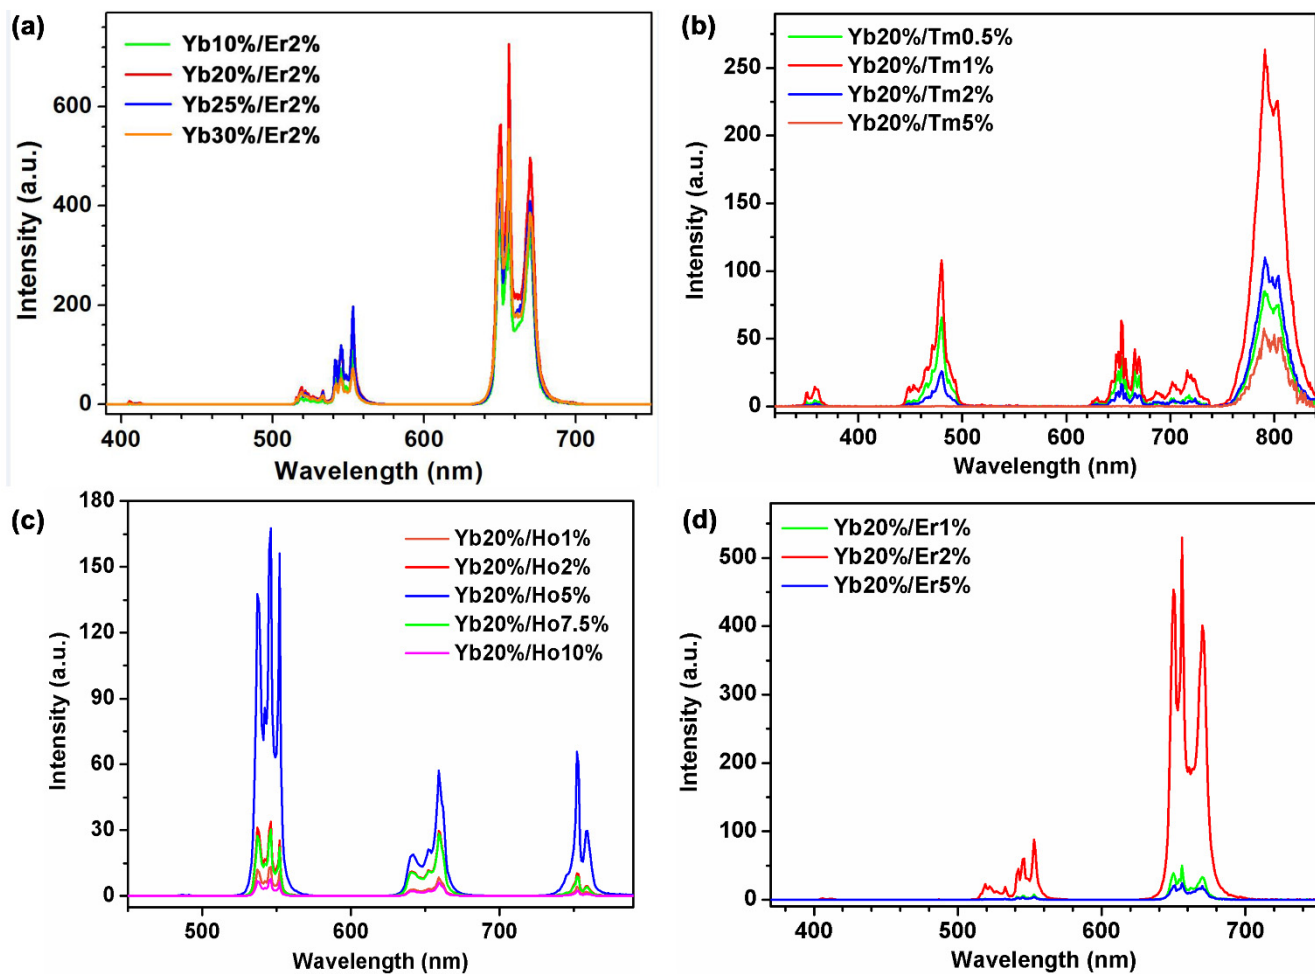

**Fig. S2** UC emission spectra for a series of Yb/Er, Yb/Tm and Yb/Ho doped  $\text{KSc}_2\text{F}_7$  nanorods as a function of different Yb, Er, Tm and Ho doping concentrations. All the UC emission spectra were measured under identical experimental conditions upon a 980-nm diode laser excitation with a power density of  $50 \text{ W cm}^{-2}$ . The results indicate that the optimum (a) Yb, (b) Tm, (c) Ho and (d) Er doping concentrations for intense UC luminescence in  $\text{KSc}_2\text{F}_7$  nanorods were determined to be 20, 1, 5, and 2 mol%, respectively.

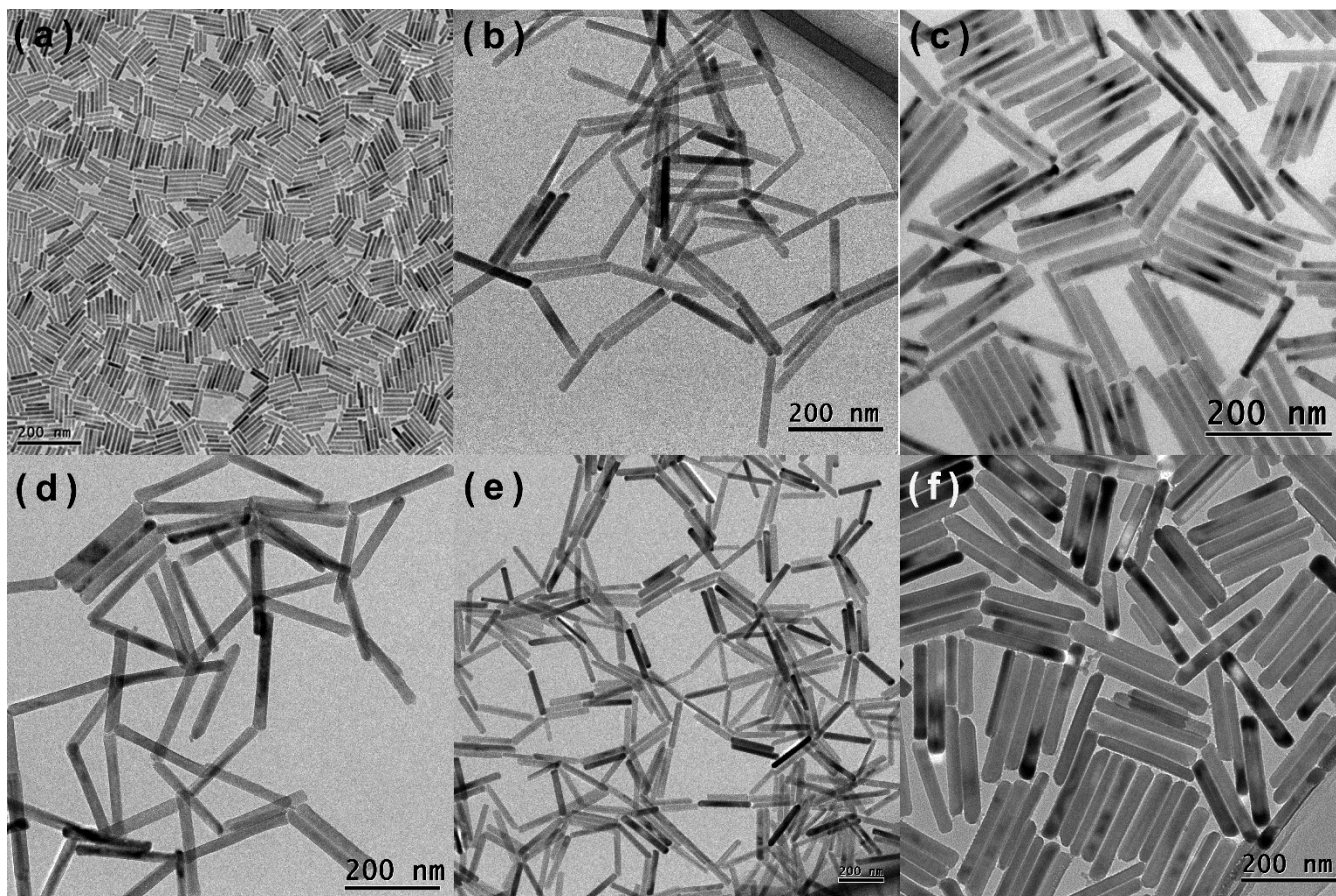

**Fig. S3** Typical transmission electron microscopy (TEM) images for as-synthesized (a)  $\text{KSc}_2\text{F}_7:\text{Yb/Tm}$  seeds, (b)  $\text{KSc}_2\text{F}_7:\text{Yb/Tm}@\text{KSc}_2\text{F}_7$ , (c)  $\text{KSc}_2\text{F}_7:\text{Yb/Tm}@\text{KSc}_2\text{F}_7@\text{KSc}_2\text{F}_7:\text{Yb/Er}$ , (d)  $\text{KSc}_2\text{F}_7:\text{Yb/Tm}@\text{KSc}_2\text{F}_7@\text{KSc}_2\text{F}_7:\text{Yb/Er}@\text{KSc}_2\text{F}_7$ , (e)  $\text{KSc}_2\text{F}_7:\text{Yb/Tm}@\text{KSc}_2\text{F}_7@\text{KSc}_2\text{F}_7:\text{Yb/Er}@\text{KSc}_2\text{F}_7@\text{KSc}_2\text{F}_7:\text{Yb/Ho}$ , and (f)  $\text{KSc}_2\text{F}_7:\text{Yb/Tm}@\text{KSc}_2\text{F}_7@\text{KSc}_2\text{F}_7:\text{Yb/Er}@\text{KSc}_2\text{F}_7@\text{KSc}_2\text{F}_7:\text{Yb/Ho}@\text{KSc}_2\text{F}_7$  nanorods retrieved at each stage of our synthesis procedures for  $\text{Tm}@\text{Er}@\text{Ho}@\text{Pure}$  nanorods, showing that all the samples have a rod shape with average lengths about 150, 170, 186, 210, 228 and 241 nm, respectively. The gradually increased nanorod lengths clearly demonstrate the successful oriented epitaxial growth and the formation of multilayer nanostructures of  $\text{KSc}_2\text{F}_7$  nanorods.

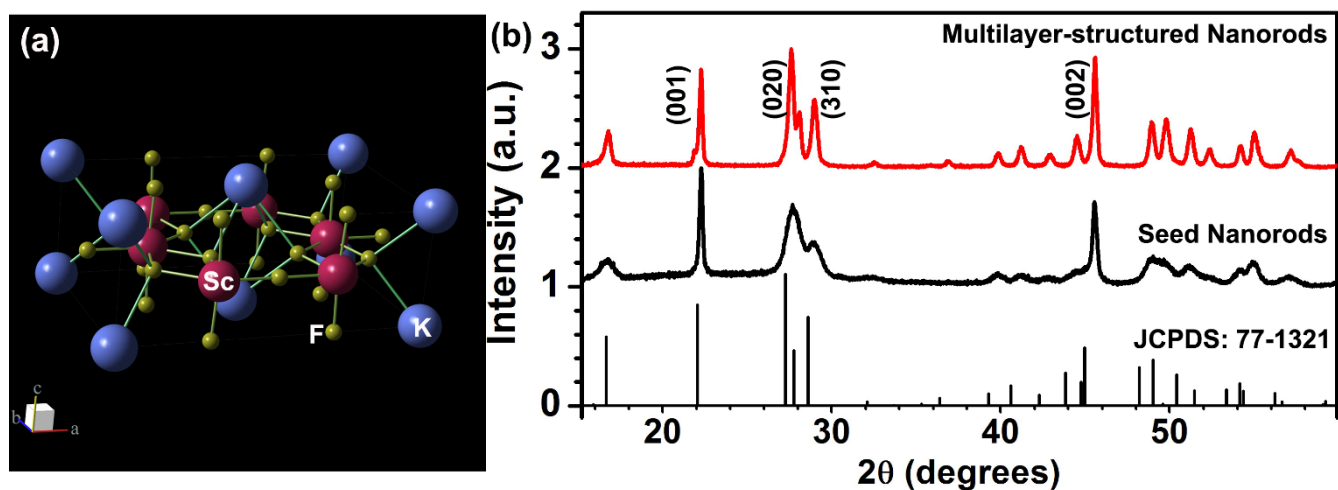

**Fig. S4** (a) Schematic presentation of orthorhombic-phase  $\text{KSc}_2\text{F}_7$  crystal structure. (b) XRD patterns for as-synthesized  $\text{KSc}_2\text{F}_7$  seeds and multilayer-structured  $\text{KSc}_2\text{F}_7$  nanorods, showing that all XRD peaks for seed and multilayer-structured  $\text{KSc}_2\text{F}_7$  nanorods can be well indexed in accordance with orthorhombic-phase  $\text{KSc}_2\text{F}_7$  crystal structure (JCPDS: No. 77-1321).

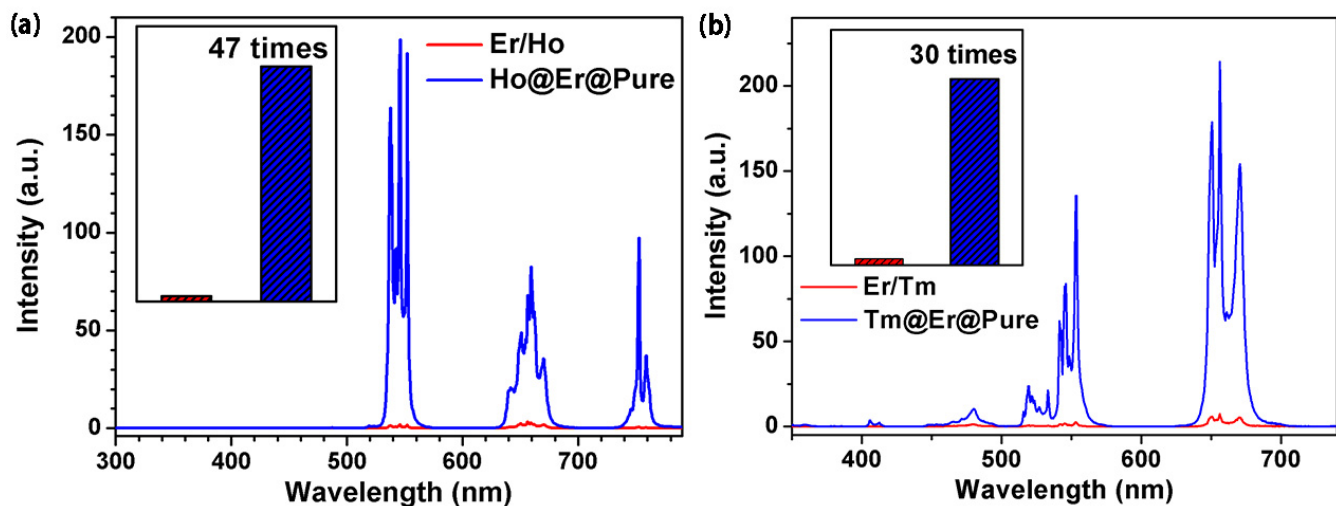

**Fig. S5** Comparison of UC emission spectra and integrated UC emission intensities (inset) for (a)  $\text{KSc}_2\text{F}_7:\text{Yb}/\text{Er}/\text{Ho}$  (Er/Ho),  $\text{KSc}_2\text{F}_7:\text{Yb}/\text{Ho}@\text{KSc}_2\text{F}_7@\text{KSc}_2\text{F}_7:\text{Yb}/\text{Er}@\text{KSc}_2\text{F}_7$  (Ho@Er@Pure) (b)  $\text{KSc}_2\text{F}_7:\text{Yb}/\text{Er}/\text{Tm}$  (Er/Tm) and  $\text{KSc}_2\text{F}_7:\text{Yb}/\text{Tm}@\text{KSc}_2\text{F}_7@\text{KSc}_2\text{F}_7:\text{Yb}/\text{Er}@\text{KSc}_2\text{F}_7$  (Tm@Er@Pure) nanorods. All the UC emission spectra were measured under identical experimental conditions upon a 980-nm diode laser excitation with a power density of  $50 \text{ W cm}^{-2}$ . The integrated UC emission intensities for Ho@Er@Pure and Tm@Er@Pure nanorods were found to be enhanced by a factor of  $\sim 47$  and  $\sim 30$  when compared to their Er/Ho and Er/Tm counterparts, respectively, demonstrating the key role of pure  $\text{KSc}_2\text{F}_7$  interlayer in enhancing the UC luminescence efficiency.

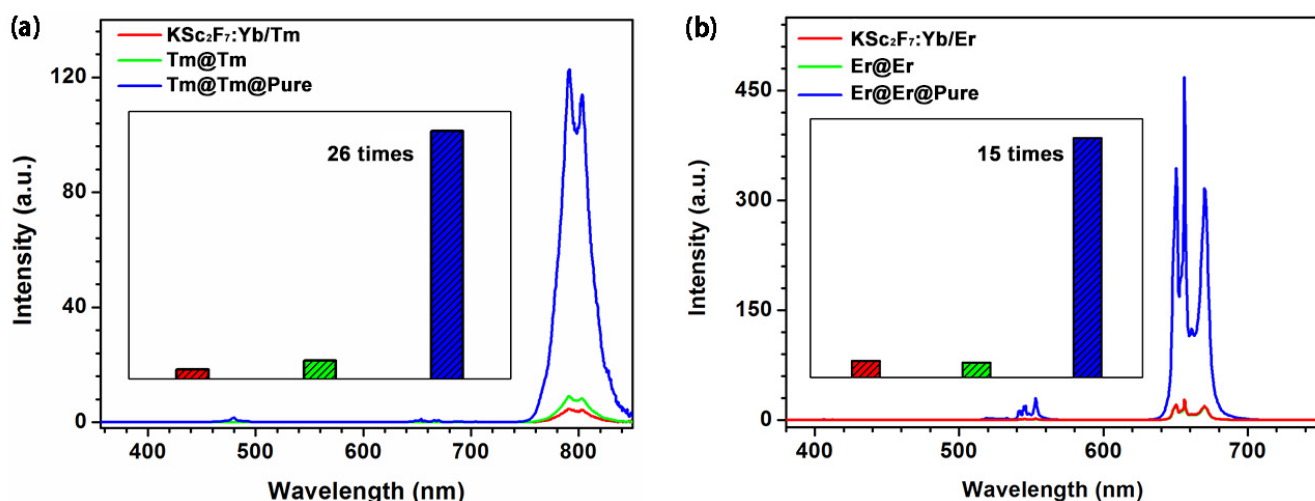

**Fig. S6** Comparison of UC emission spectra and integrated UC emission intensities (Inset) for KSc<sub>2</sub>F<sub>7</sub>:Yb/Er, KSc<sub>2</sub>F<sub>7</sub>:Yb/Er@KSc<sub>2</sub>F<sub>7</sub>:Yb/Er (Er@Er), KSc<sub>2</sub>F<sub>7</sub>:Yb/Er@KSc<sub>2</sub>F<sub>7</sub>@KSc<sub>2</sub>F<sub>7</sub>:Yb/Er@KSc<sub>2</sub>F<sub>7</sub> (Er@Er@Pure), KSc<sub>2</sub>F<sub>7</sub>:Yb/Tm, KSc<sub>2</sub>F<sub>7</sub>:Yb/Tm@KSc<sub>2</sub>F<sub>7</sub>:Yb/Tm (Tm@Tm), and KSc<sub>2</sub>F<sub>7</sub>:Yb/Tm@KSc<sub>2</sub>F<sub>7</sub>@KSc<sub>2</sub>F<sub>7</sub>:Yb/Tm@KSc<sub>2</sub>F<sub>7</sub> (Tm@Tm@Pure) nanorods. All the UC emission spectra were measured under identical experimental conditions upon a 980-nm diode laser excitation with a power density of 50 W cm<sup>-2</sup>. The integrated UC emission intensities for Er@Er@Pure and Tm@Tm@Pure nanorods were found to be 15-26 times higher than those of KSc<sub>2</sub>F<sub>7</sub>:Yb/Er, KSc<sub>2</sub>F<sub>7</sub>:Yb/Tm, Tm@Tm and Er@Er nanorods. These results clearly demonstrate that our design strategy works also very well for Yb/X pair singly doped KSc<sub>2</sub>F<sub>7</sub> nanorods to suppress the unwanted CR-ETs occurred at the identical Ln ions, thereby revealing the versatility of our design strategy.

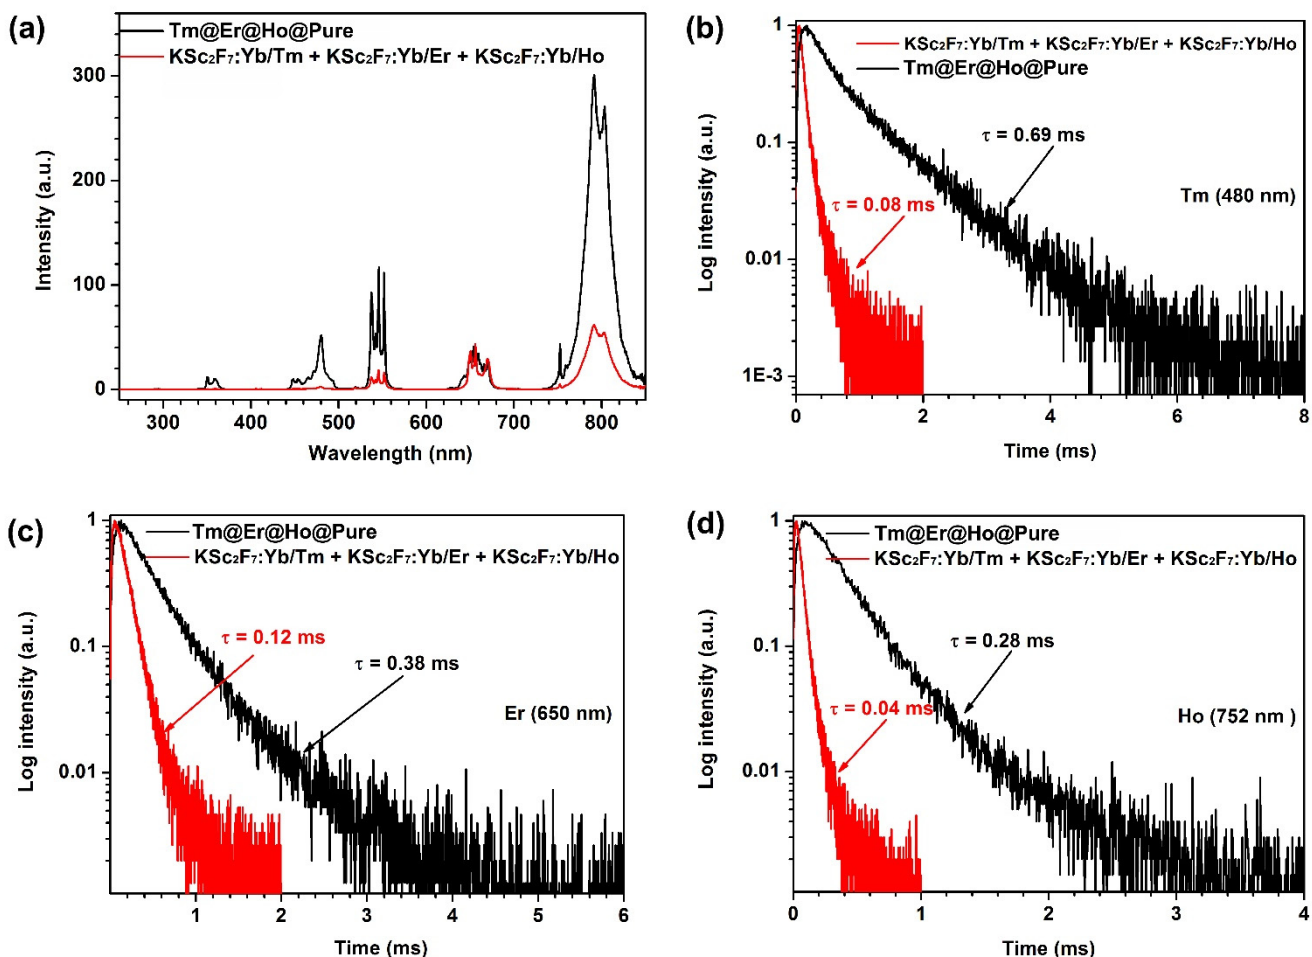

**Fig. S7** Comparison of UC (a) luminescence spectra and (b, c and d) decay curves for Tm@Er@Ho@Pure nanorods and the mixture of KSc<sub>2</sub>F<sub>7</sub>:Yb/Er, KSc<sub>2</sub>F<sub>7</sub>:Yb/Tm and KSc<sub>2</sub>F<sub>7</sub>:Yb/Ho nanorods with almost identical length to the Tm@Er@Ho@Pure nanorods. The UC emission spectra were measured under identical experimental conditions upon a 980-nm diode laser excitation with a power density of 50 W cm<sup>-2</sup>, while the UC luminescence decay curves were conducted by monitoring Tm, Er and Ho UC emissions centered at 480, 650 and 752 nm upon excitation by a 980-nm pulsed laser. The overall UC intensity for Tm@Er@Ho@Pure nanorods were observed to be 7 times higher than that of the mixture of the KSc<sub>2</sub>F<sub>7</sub>:Yb/Er, KSc<sub>2</sub>F<sub>7</sub>:Yb/Tm and KSc<sub>2</sub>F<sub>7</sub>:Yb/Ho nanorods with a mass ratio of 1:1:1, and the UC luminescence lifetimes for the Tm, Er and Ho ions in Tm@Er@Ho@Pure nanorods were also observed to be much longer than those of the mixture of the KSc<sub>2</sub>F<sub>7</sub>:Yb/Er, KSc<sub>2</sub>F<sub>7</sub>:Yb/Tm and KSc<sub>2</sub>F<sub>7</sub>:Yb/Ho nanorods. These results clearly demonstrate the advantages of multilayer-structured design strategy we proposed in producing intense UC luminescence, and thereby providing another solid evidence for the effective suppression of the unwanted CR-ETs in Tm@Er@Ho@Pure nanorods.

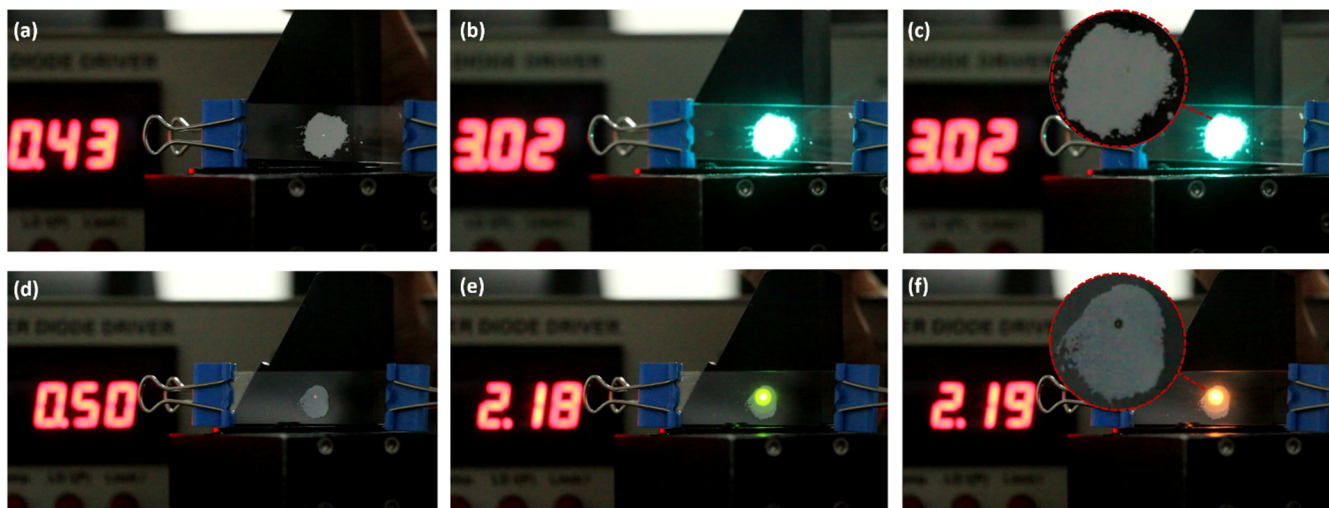

**Fig. S8** UC emission photographs of (a-c) Tm@Er@Ho@Pure and (d-f) Yb/Tm/Er/Ho co-doped nanorods under 980-nm diode laser irradiation at different power densities, demonstrating the much better photo-stability (or thermal stability) of Tm@Er@Ho@Pure nanorods than that of directly co-doped nanorods. Note that the red values in Figure S6a-f represent the driving current of 980-nm diode laser instead of the power density, which were measured to be 4, 200, 200, 5, 100 and 101 W cm<sup>-2</sup> by using a dynamometer. It can be clearly seen that the directly co-doped nanorods have been burnt out upon 980-nm diode laser at a power density of ~100 W cm<sup>-2</sup>, while Tm@Er@Ho@Pure nanorods remain almost unchanged when excited at the power density even higher than ~200 W cm<sup>-2</sup>. This phenomenon provides solid evidence for the existence of severe CR-ETs that can quench excitation energy and dissipate it non-radiatively as heat in Yb/Tm/Er/Ho co-doped nanorods, while such deleterious cross-relaxation type energy transfers can be effectively eliminated in Tm@Er@Ho@Pure nanorods and thus lead to much better photo-stability (or thermal stability) and UC emission efficiency in comparison with the co-doped nanorods.

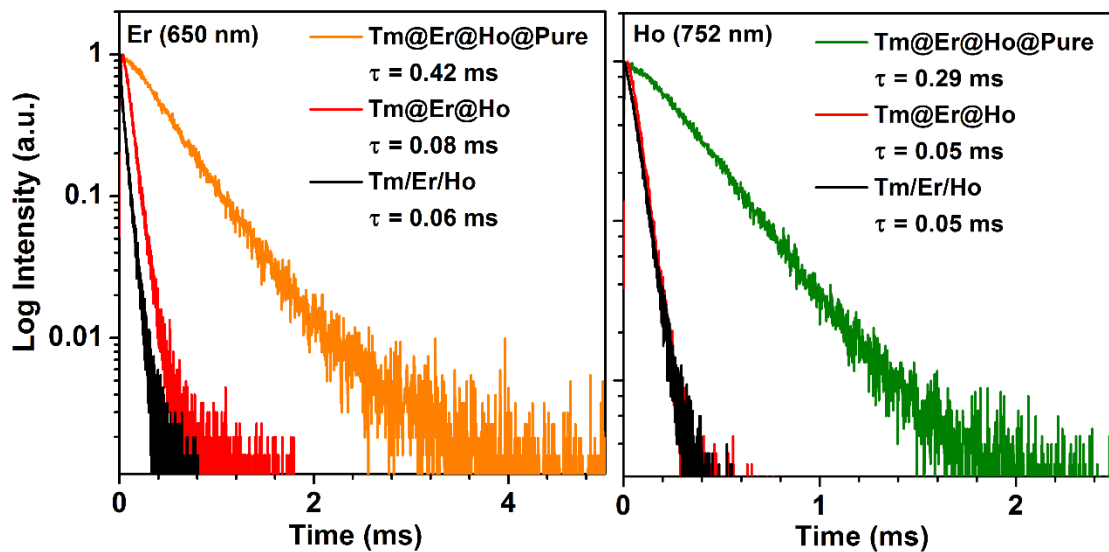

**Fig. S9** UC luminescence decays of Er (left) and Ho (right) emissions centered at 650 and 752 nm in Tm@Er@Ho@Pure, Tm@Er@Ho and Tm/Er/Ho nanorods upon excitation at 980 nm. Both the UC lifetimes for Er and Ho ions in Tm@Er@Ho@Pure nanorods were measured to be much longer than those in Tm/Er/Ho (or Tm@Er@Ho) counterparts, showing that the unwanted CR-ETs can be effectively eliminated in Tm@Er@Ho@Pure nanorods and thereby resulting in much prolonged UC lifetimes of Er and Ho ions when compared to Tm@Er@Ho and Tm/Er/Ho nanorods.

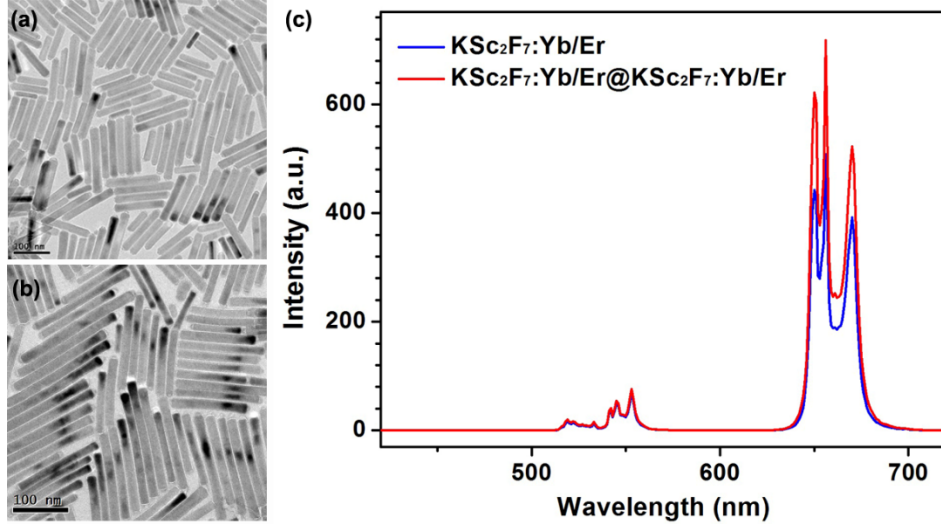

**Fig. S10** (a, b) TEM images of two types of Yb/Er co-doped KSc<sub>2</sub>F<sub>7</sub> nanorods with different lengths of ~150 and ~200 nm and diameters of ~17 and ~23 nm, and their corresponding (c) UC emission spectra upon 980-nm excitation at a power density of 50 W cm<sup>-2</sup>. It was found that the integrated UC emission intensity for Yb/Er co-doped KSc<sub>2</sub>F<sub>7</sub> nanorods were observed to remain almost unchanged regardless of their varied nanorod lengths and diameters, which thereby rules out the possibility that the enhanced UC luminescence arises from the increased Ln<sup>3+</sup> emitters when the length and diameter of multilayer-structured KSc<sub>2</sub>F<sub>7</sub> nanorods are increased.

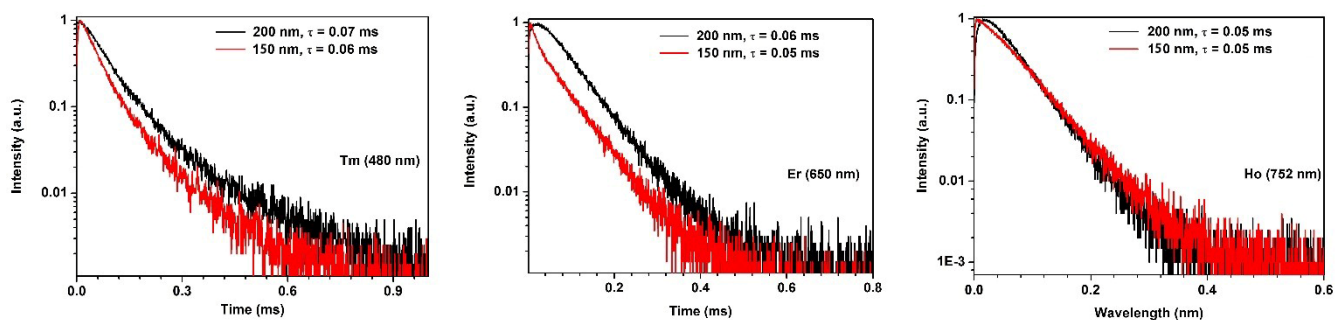

**Fig. S11** Comparison of UC luminescence decays for Yb/Tm/Er/Ho co-doped KSc<sub>2</sub>F<sub>7</sub> nanorods with lengths of ~150 nm and ~200 nm by monitoring Tm, Er and Ho UC emissions centered at 480, 650 and 752 nm upon excitation using a 980-nm pulsed laser. All the UC luminescence lifetimes for the Tm, Er and Ho ions were observed to be almost unchanged with the varied nanorod lengths. This phenomenon is understandable due to the almost identical surface-to-volume ratios of Tm, Er and Ho ions in the Yb/Tm/Er/Ho co-doped KSc<sub>2</sub>F<sub>7</sub> nanorods regardless of their varied nanorod lengths.

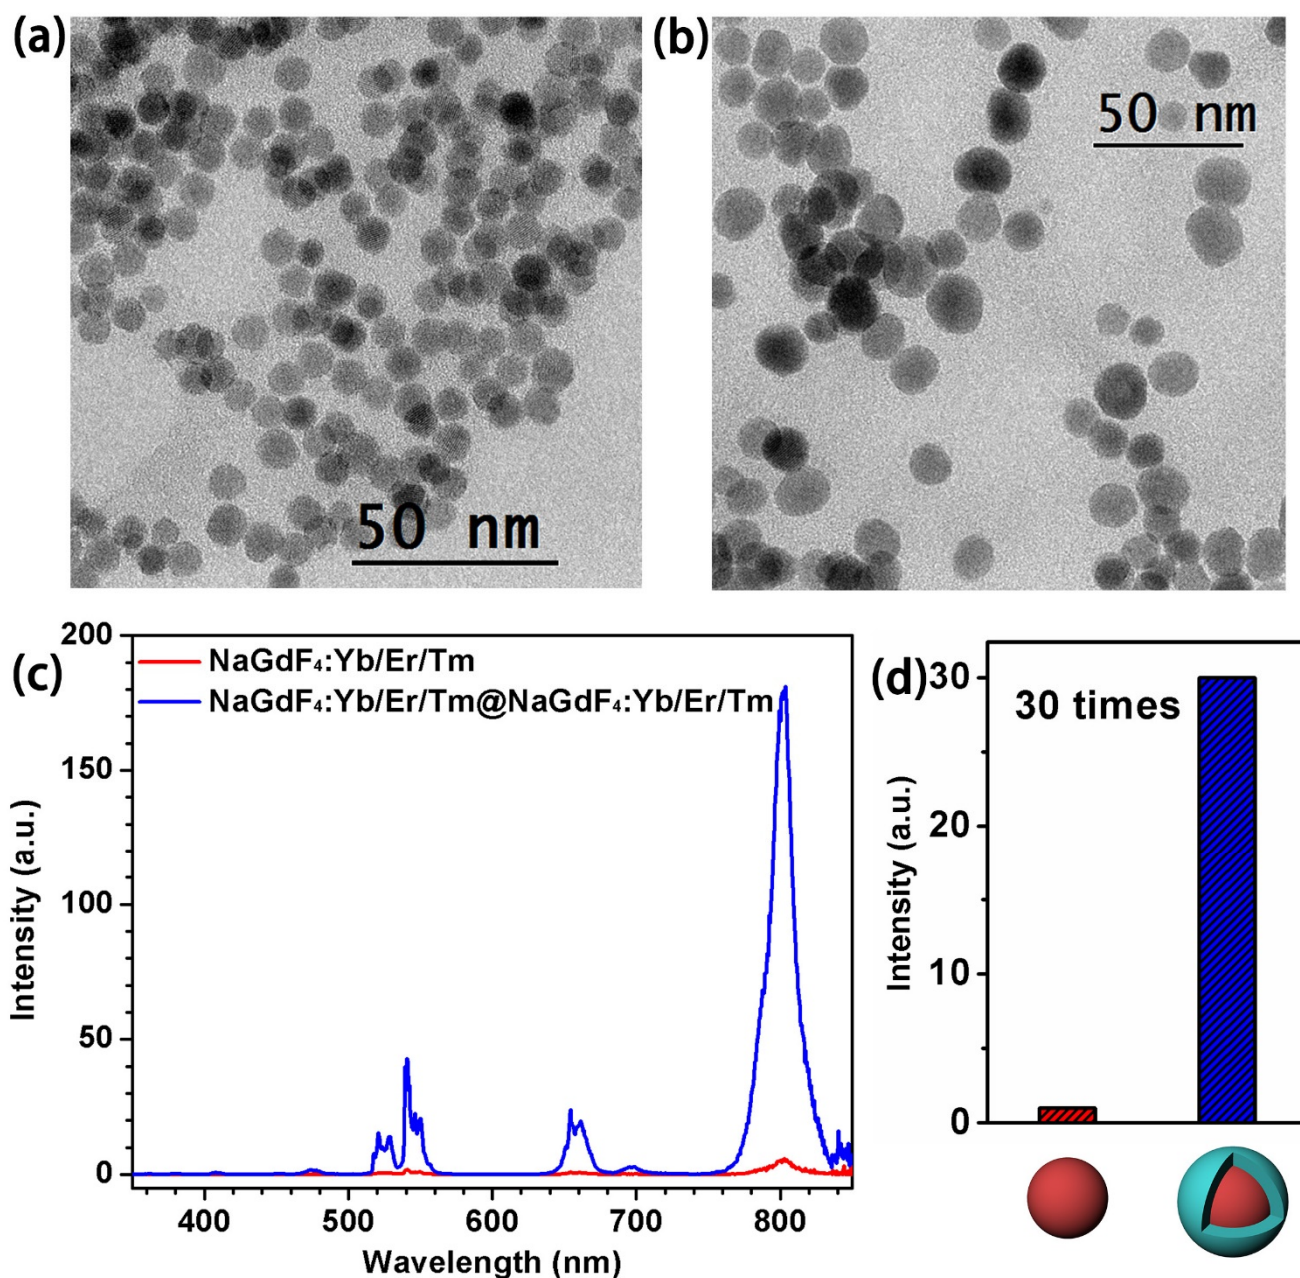

**Fig. S12** TEM images for hexagonal (a) NaGdF<sub>4</sub>:Yb/Er/Tm core and (b) NaGdF<sub>4</sub>:Yb/Er/Tm@NaGdF<sub>4</sub>:Yb/Er/Tm core-shell NPs with an average nanoparticle size  $\sim 10$  and  $\sim 15$  nm, and their corresponding UC (c) luminescence spectra and (d) integrated intensities. The UC intensity for core-shell NPs was observed to be enhanced by a factor of  $\sim 30$  times relative to the core NPs when the nanoparticle size increased from  $\sim 10$  to  $\sim 15$  nm. This result clearly demonstrates that the enhanced UC luminescence for core-shell NPs is associated with the inhibition of surface quenching effect rather than the unwanted CR-ETs between Er and Tm ions, in view of the fact that Er and Tm ions are uniformly distributed in both the core and core-shell NPs.

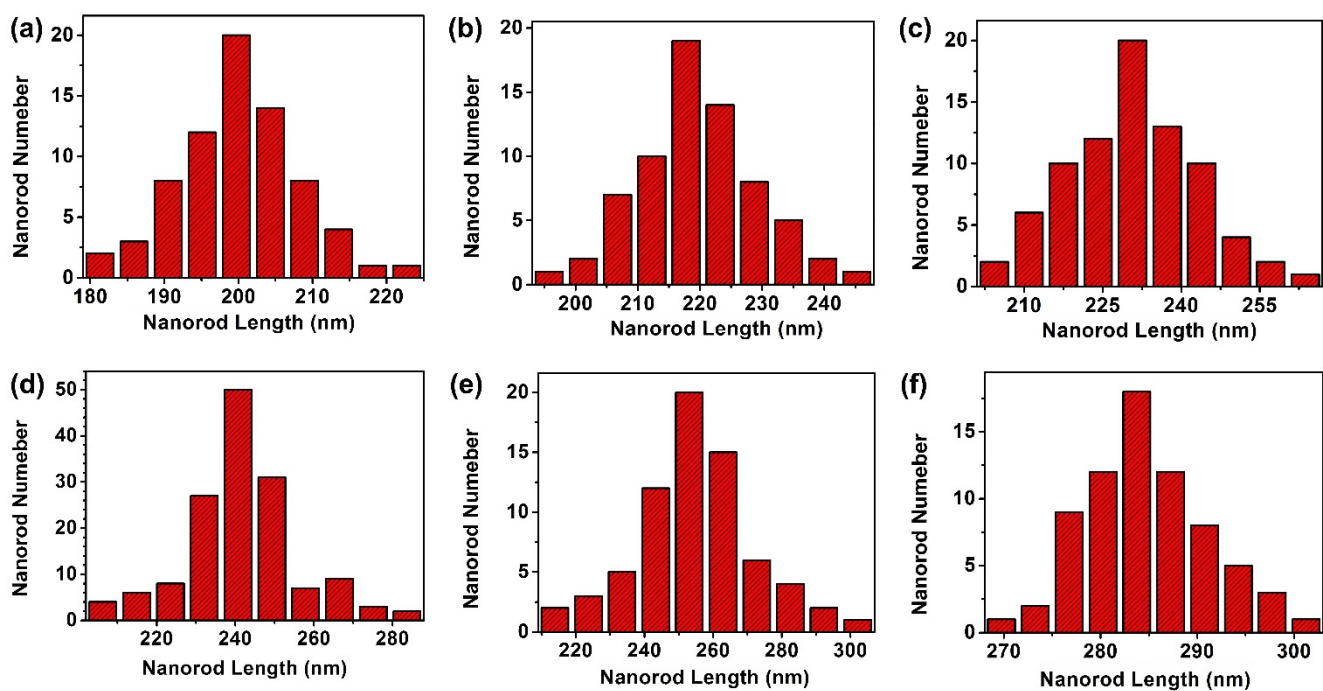

**Fig. S13** Size distribution of a series of  $\text{KSc}_2\text{F}_7:\text{Yb/Tm}@\text{KSc}_2\text{F}_7@\text{KSc}_2\text{F}_7:\text{Yb/Er}@\text{KSc}_2\text{F}_7$  ( $\text{Tm}@\text{Er}@\text{Pure}$ ) nanorods with different thicknesses of pure  $\text{KSc}_2\text{F}_7$  interlayer. The average lengths for the  $\text{Tm}@\text{Er}@\text{Pure}$  nanorods were determined to be  $200 \pm 9$ ,  $219 \pm 8$ ,  $230 \pm 12$ ,  $241 \pm 6$ ,  $255 \pm 8$  and  $285 \pm 12$  nm on the basis of the length histograms obtained from TEM images of 150 nanorods. Accordingly, the thickness of pure  $\text{KSc}_2\text{F}_7$  interlayers were estimated to be 0,  $\sim 4.8$ ,  $\sim 7.5$ ,  $\sim 10.3$ ,  $\sim 13.8$  and  $\sim 21.3$  nm, respectively, based on the amount of pure  $\text{KSc}_2\text{F}_7$  interlayer precursors injected in our synthesis procedures.

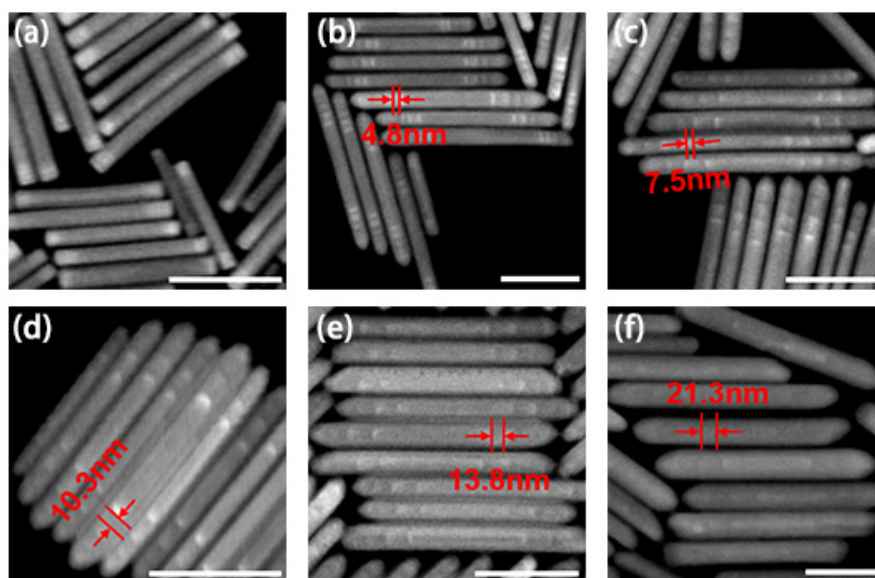

**Fig. S14** Representative high angle annular dark-field scanning TEM (HAADF-STEM) images for Tm@Er@Pure nanorods with varied thicknesses of pure KSc<sub>2</sub>F<sub>7</sub> interlayer. The discernible contrast for pure KSc<sub>2</sub>F<sub>7</sub> and Yb/Er (or Yb/Tm) pair doped KSc<sub>2</sub>F<sub>7</sub> layers in HAADF-STEM images clearly demonstrates the formation of multilayer architectures of Tm@Er@pure nanorods with varied thicknesses of pure KSc<sub>2</sub>F<sub>7</sub> interlayer from 0 to 21.3 nm and cross section radius from about 8 to 15 nm (scale bar = 100 nm).

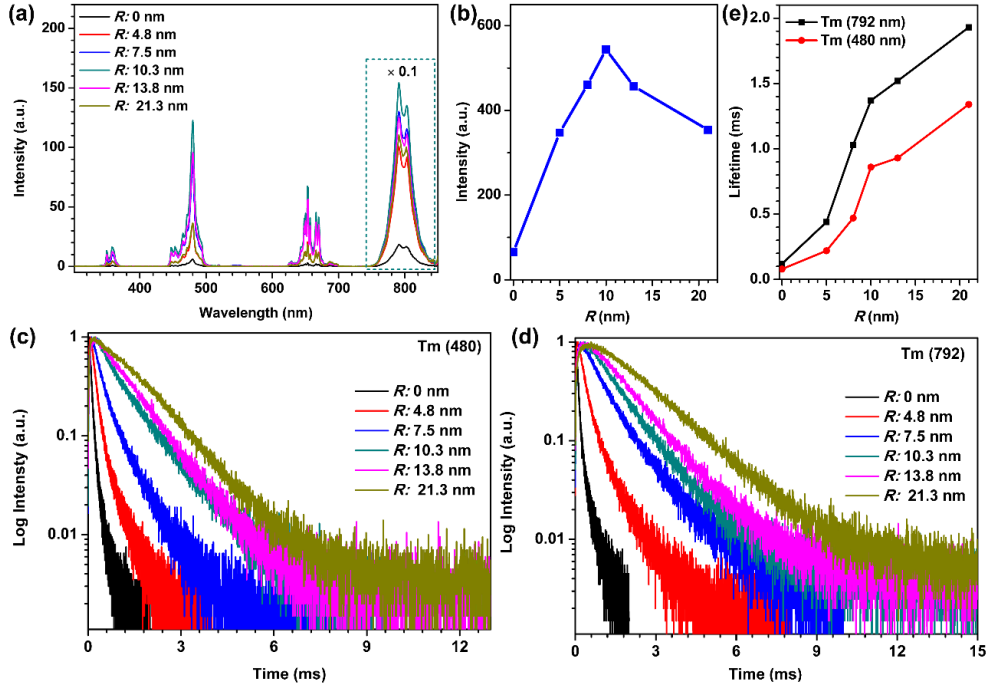

**Fig. S15** (a) Comparison of UC luminescence spectra for KSc<sub>2</sub>F<sub>7</sub>:Yb/Tm@KSc<sub>2</sub>F<sub>7</sub>@KSc<sub>2</sub>F<sub>7</sub>:Yb/Tm@KSc<sub>2</sub>F<sub>7</sub> (Tm@Tm@Pure) nanorods with different thicknesses of pure KSc<sub>2</sub>F<sub>7</sub> interlayers ranging from 0 to ~21.3 nm, and (b) their corresponding integrated UC emission intensity on the thickness of pure KSc<sub>2</sub>F<sub>7</sub> interlayer. UC luminescence decays from (c) <sup>1</sup>G<sub>4</sub> and (d) <sup>3</sup>H<sub>4</sub> states of Tm ion in Tm@Tm@Pure nanorods by monitoring Tm UC emissions centered at 480 and 792 nm upon excitation by a 980-nm pulsed laser, and e) their corresponding UC lifetime as a function of the thickness of pure KSc<sub>2</sub>F<sub>7</sub> interlayer. Similar to the case of Tm@Er@Pure nanorods, the integrated UC emission intensity for Tm@Tm@Pure nanorods is also observed to rise at first and then decrease afterwards with increasing thickness of pure KSc<sub>2</sub>F<sub>7</sub> interlayer from 0 to ~21.3 nm. The initial enhancement in UC emission intensity is conceivable due to the stepwise suppressed CR-ETs between Er<sup>3+</sup> and Tm<sup>3+</sup> ions in view of the gradually increased interlayer thickness, whereas the subsequent decrease in UC emission intensity is primarily associated with the reduced overall Tm doping concentration that deviates from their optimum ones in KSc<sub>2</sub>F<sub>7</sub> nanorods owing to the excessive growth of pure KSc<sub>2</sub>F<sub>7</sub> interlayer. As a result, step-by-step prolonged UC lifetimes of <sup>1</sup>G<sub>4</sub> (480 nm) and <sup>3</sup>H<sub>4</sub> (792 nm) states of Tm ion are detected in Tm@Tm@Pure nanorods, due to the fact that both the stepwise suppressed CR-ETs and reduced overall doping concentration of Tm ion will certainly decrease the non-radiative relaxation rates for the excited energy levels of Tm<sup>3+</sup> ion and thus result in the prolonged UC lifetimes.

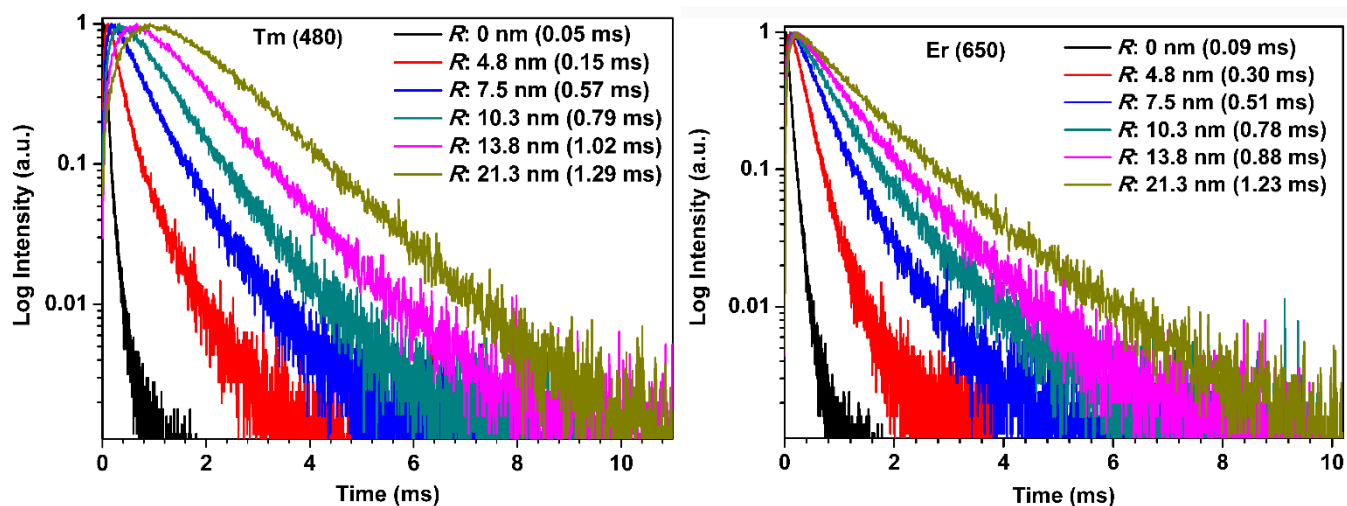

**Fig. S16** Comparison of UC luminescence decays for  $\text{KSc}_2\text{F}_7\text{:Yb/Tm@KSc}_2\text{F}_7\text{:Yb/Er@KSc}_2\text{F}_7$  (Tm@Er@Pure) nanorods with different thicknesses of pure  $\text{KSc}_2\text{F}_7$  interlayers ranging from 0 to  $\sim 21.3$  nm, by monitoring Tm (left) and Er (right) UC emissions centered at 480 and 650 nm upon excitation using a 980-nm pulsed laser. It can be clearly seen that the UC lifetimes for both Er and Tm ions in Tm@Er@Pure nanorods increase gradually with the increased thickness of pure  $\text{KSc}_2\text{F}_7$  interlayer. This phenomenon is expected in view of the fact that both the suppressed CR-ETs and/or reduced overall doping concentrations of Tm and Er ions in Tm@Er@Pure nanorods by tuning the thickness of pure  $\text{KSc}_2\text{F}_7$  interlayer will certainly decrease the non-radiative relaxation rates for the excited energy levels of Tm and Er ions, thus giving rise to the prolonged UC lifetimes.

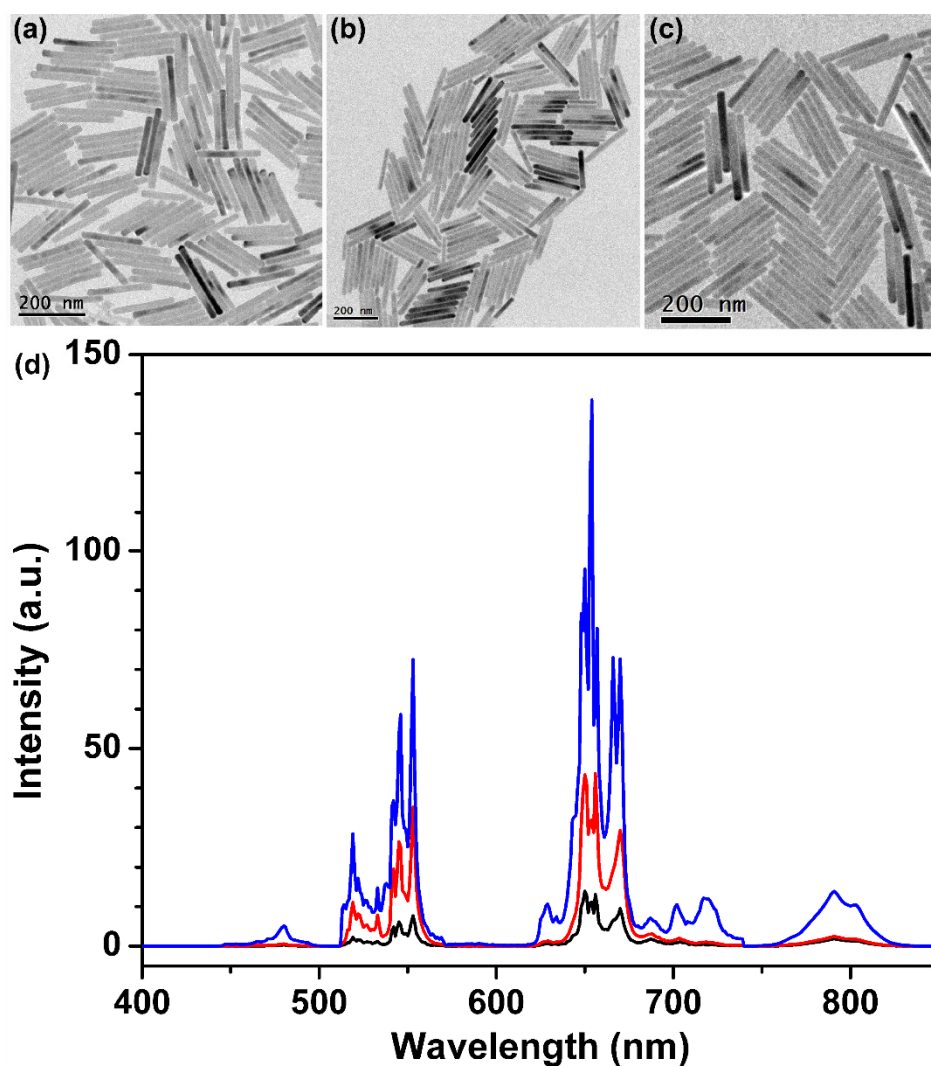

**Fig. S17** (a-c) TEM images for  $\text{KSc}_2\text{F}_7:\text{Yb}/\text{Tm}@\text{KSc}_2\text{F}_7:\text{Yb}/\text{Er}$  (without pure  $\text{KSc}_2\text{F}_7$  interlayer and outmost protection layer),  $\text{KSc}_2\text{F}_7:\text{Yb}/\text{Tm}@\text{KSc}_2\text{F}_7:\text{Yb}/\text{Er}@\text{KSc}_2\text{F}_7$  (only with the outmost  $\text{KSc}_2\text{F}_7$  protection layer of  $\sim 10.3$  nm) and  $\text{KSc}_2\text{F}_7:\text{Yb}/\text{Tm}@\text{KSc}_2\text{F}_7@\text{KSc}_2\text{F}_7:\text{Yb}/\text{Er}@\text{KSc}_2\text{F}_7$  (with the outmost protection layer of  $\sim 5$  nm and pure  $\text{KSc}_2\text{F}_7$  interlayer of  $\sim 10.3$  nm) nanorods with increased cross section radii of  $\sim 8$ ,  $\sim 9$  and  $\sim 10$  nm, respectively, and (d) their corresponding UC emission spectra upon 980-nm excitation at a power density of  $50 \text{ W cm}^{-2}$ . The UC luminescence intensity for  $\text{KSc}_2\text{F}_7:\text{Yb}/\text{Tm}@\text{KSc}_2\text{F}_7@\text{KSc}_2\text{F}_7:\text{Yb}/\text{Er}@\text{KSc}_2\text{F}_7$  (blue) nanorods was determined to be 8.6 and 3.7 times stronger than those  $\text{KSc}_2\text{F}_7:\text{Yb}/\text{Tm}@\text{KSc}_2\text{F}_7:\text{Yb}/\text{Er}$  (black) and  $\text{KSc}_2\text{F}_7:\text{Yb}/\text{Tm}@\text{KSc}_2\text{F}_7:\text{Yb}/\text{Er}@\text{KSc}_2\text{F}_7$  (red) nanorods, respectively, which unambiguously suggests that the enhanced UC emissions for  $\text{Tm}@\text{Er}@\text{Pure}$  nanorods are primarily originated from the pure  $\text{KSc}_2\text{F}_7$  interlayer instead of the outmost  $\text{KSc}_2\text{F}_7$  protection layer.

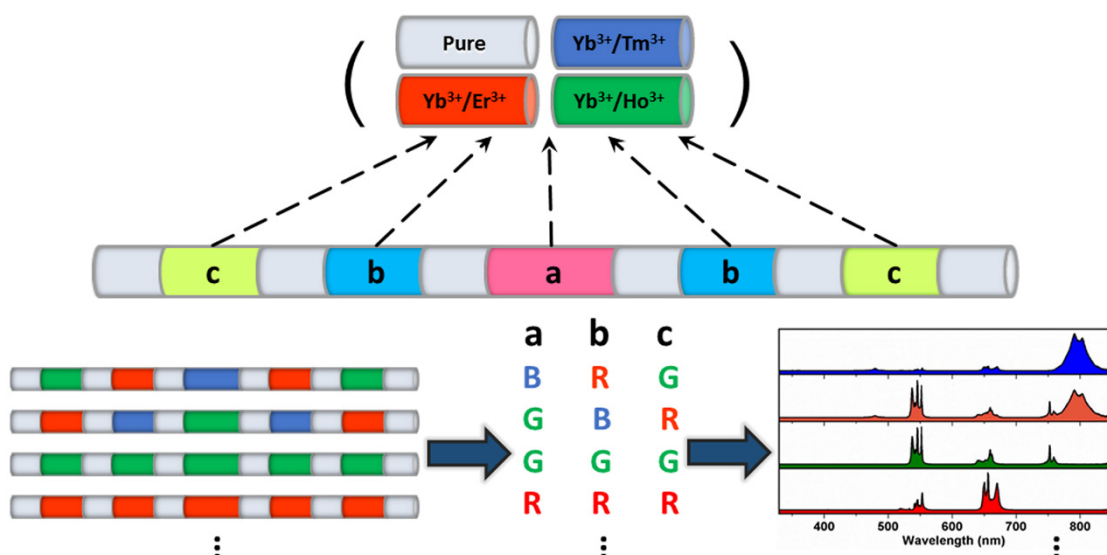

**Fig. S18** Schematic design of multilayer-structured  $\text{KSc}_2\text{F}_7$  nanorod comprising Yb/Tm, Yb/Er and Yb/Ho pairs separately incorporated layers and pure  $\text{KSc}_2\text{F}_7$  interlayers to render the red, green and blue UC emissions in one single nanorod, demonstrating the diversity and flexibility of the multilayer structures we designed. By changing the doping locations (marked by a, b and c) as well as the combinations of Yb/Tm, Yb/Er and Yb/Ho pairs, in all, 64 (that is,  $4 \times 4 \times 4$ ) kinds of  $\text{KSc}_2\text{F}_7$  nanorods with diverse UC emission patterns and lifetime outputs can be obtained by adopting the multilayer-structured design strategy we specially designed.

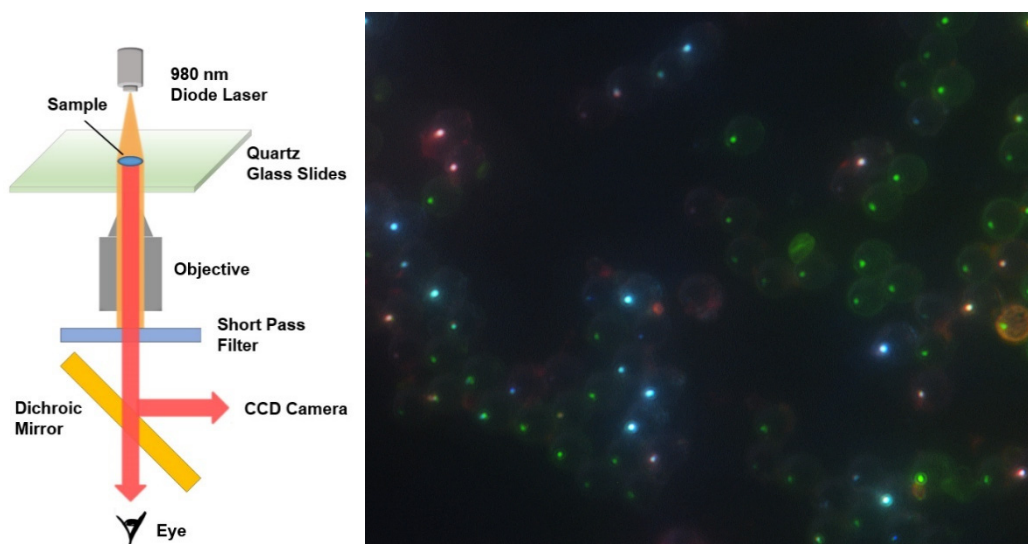

**Fig. S19** Schematic illustration of the experimental setup (left) for UC luminescent imaging of the multilayer-structured  $\text{KSc}_2\text{F}_7$  nanorods tagged polystyrene microbeads. A 980-nm diode laser was used as excitation source. The UC emission light was separated from the excitation light by a dichroic mirror (DMSP805R), and short pass filter of 750 nm (FESH0750) was placed in the front of the detector to filter the excitation light. The UC luminescence image was recorded by a Nikon ECLIPSE Ti-U microscope equipped with Nikon digital sight DS-Ri1 CCD imaging system. UC luminescence photograph (right) of the nanorod-tagged polystyrene microbeads at low magnification showing that multicolor UC emissions can be simultaneously imaged under 980-nm diode laser excitation. Note that the blue, cyan, green, yellow and red colors were generated from Tm, Er and Ho ions doped in different  $\text{KSc}_2\text{F}_7$  nanorods with different multilayer structures.

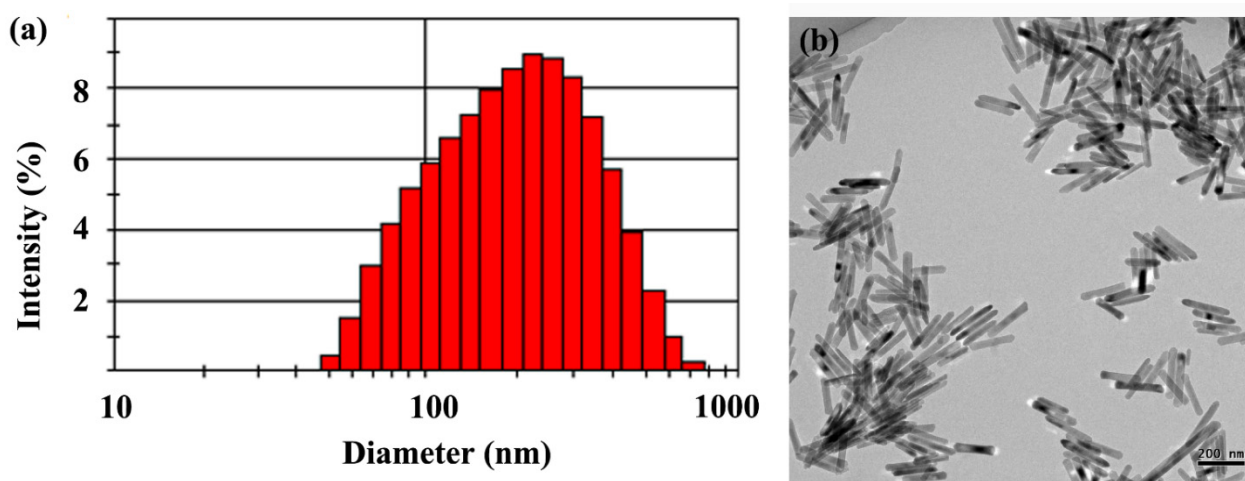

**Fig. S20** (a) Size distribution for water-soluble Tm@Er@Ho@Pure nanorods obtained from DLS analysis, and their corresponding b) TEM image when dispersed in aqueous solution. The average hydrodynamic diameter for the water-soluble Tm@Er@Ho@Pure nanorods dispersed in aqueous solution was determined to be ~224 nm, which is basically consistent with that of the as-synthesized KSc<sub>2</sub>F<sub>7</sub> nanorods with an average length of ~241 nm from the TEM images and thereby suggests the good dispersibility for the water-soluble KSc<sub>2</sub>F<sub>7</sub> nanorods in aqueous solution.

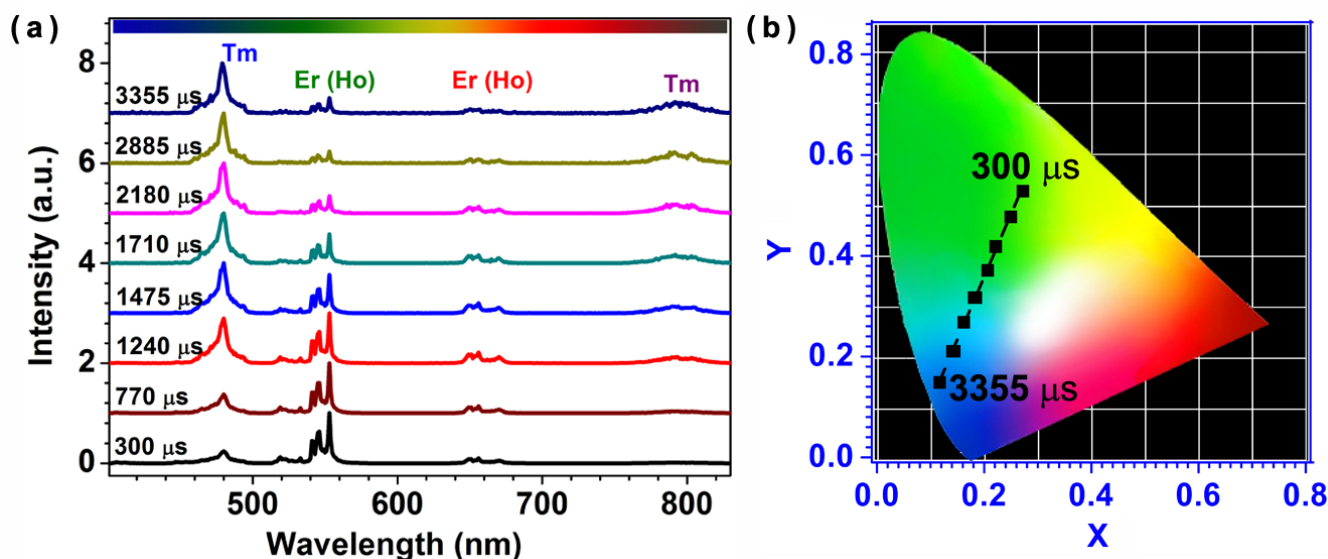

**Fig. S21** (a) Time evolution of UC emission spectra for Tm@Er@Ho@Pure nanorods when excited at 980 nm and (b) their corresponding CIE chromaticity coordinates. Due to the different UC lifetimes of Tm, Er and Ho emissions in Tm@Er@Ho@Pure nanorods, individual UC emissions of Tm, Er and Ho ions can be easily distinguished from each other by setting an appropriate delay time in the time-resolved luminescence detection. As shown in Figure S19a, in short delay time (0-1240  $\mu$ s), the whole UC emission spectra are dominated by the short-lived green emissions of Er and Ho ions (centered at 554 nm) upon excitation at 980 nm, while the long-lived blue emissions of Tm are prominent when the delay time is longer than 1475  $\mu$ s, inducing a significant UC color change from green to cyan and to blue as revealed by their corresponding CIE chromaticity coordinates (Figure S19b). This feature makes these multilayer-structured KSc<sub>2</sub>F<sub>7</sub> nanorods particularly suitable as time-resolved UC barcodes for advanced anti-counterfeiting in view of the tunable UC color outputs as a function of the detection time.

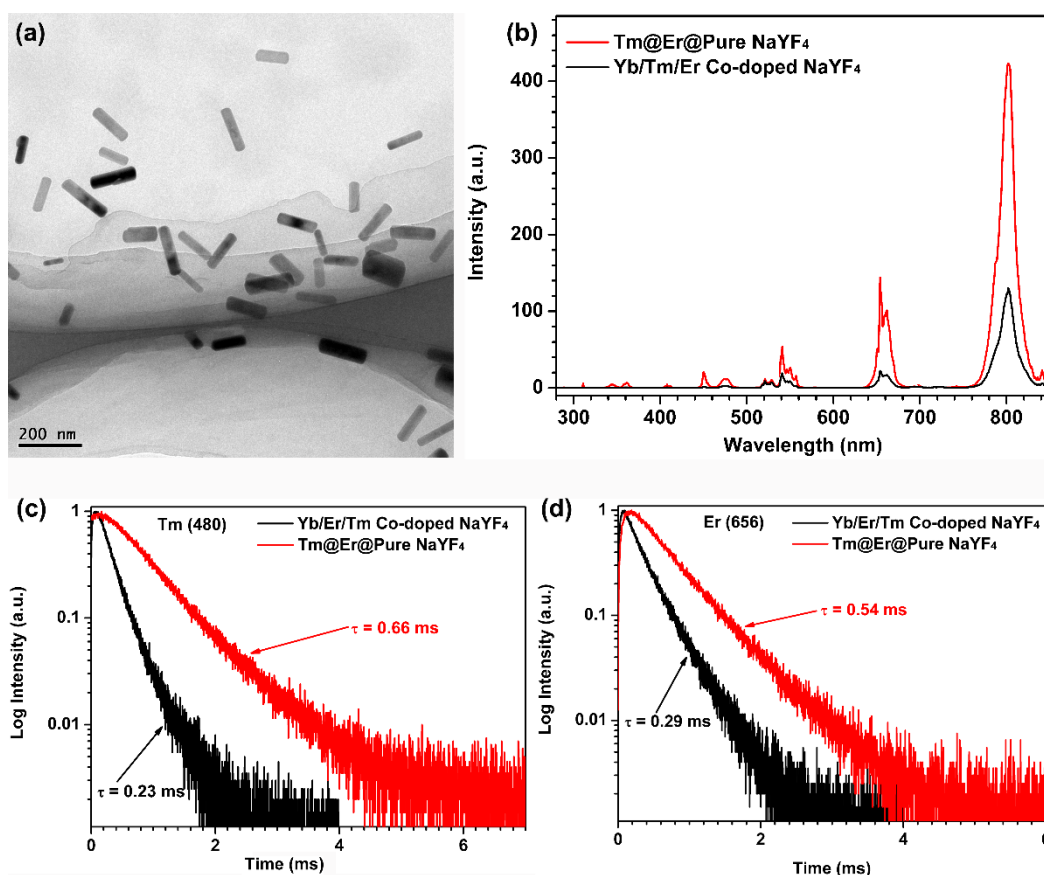

**Fig. S22** (a) TEM image for multilayer-structured hexagonal phase

NaYF<sub>4</sub>:Yb/Tm/Gd@NaYF<sub>4</sub>:Gd@NaYF<sub>4</sub>:Yb/Er/Gd@NaYF<sub>4</sub>:Gd (Tm@Er@pure NaYF<sub>4</sub>) nanorods synthesized by a slightly modified literature procedure via hydrothermal reaction,<sup>5</sup> showing that the as-synthesized Tm@Er@pure NaYF<sub>4</sub> nanorods have a rod shape with an average length of  $150 \pm 30$  nm and a diameter of  $30 \pm 10$  nm. The doping concentrations of Yb, Er, Tm and Gd ions were determined to be 20, 2, 1 and 25 mol%, respectively, in NaYF<sub>4</sub> nanorods. (b) Comparison of UC luminescence spectra for Tm@Er@pure NaYF<sub>4</sub> and Yb/Tm/Er co-doped NaYF<sub>4</sub> nanorods. UC luminescence decays from (c) <sup>1</sup>G<sub>4</sub> of Tm and (d) <sup>4</sup>F<sub>9/2</sub> of Er by monitoring their UC emissions centered at 480 and 656 nm, respectively, upon excitation with a 980-nm pulsed laser. Similar to the cases of Tm@Er@Pure KSc<sub>2</sub>F<sub>7</sub> nanorods we synthesized via a modified stepwise oriented epitaxial growth method, enhanced UC luminescence coupled with prolonged UC lifetimes were also detected in Tm@Er@pure NaYF<sub>4</sub> nanorods. These results clearly demonstrate that the design strategy we adopted for inhibiting CR-ETs of multiple Ln<sup>3+</sup> ions can be readily generalized for the most promising UC luminescent system of β-NaYF<sub>4</sub>, thus revealing the universality of the multilayer-structured strategy we specifically designed for highly enhanced UC luminescence.

## Supplementary Table

**Table S1.** Absolute UC QYs in Ln-doped UC nanoparticles (UCNPs). All the values were acquired under NIR laser excitation at 980 nm unless for specific designation. Note that the high UC QYs were only achieved in the cases of Yb/X pair singly-doped NPs, and such a high UC QYs up to 3.9% had not yet been achieved in multiple Yb/X pairs co-doped UCNPs before.

| Samples                                                | Size (nm)                             | Power density ( $\text{W cm}^{-2}$ )   | QY (%)        | Ref.              |
|--------------------------------------------------------|---------------------------------------|----------------------------------------|---------------|-------------------|
| Tm@Er@Ho@Pure nanorods                                 | ~245 nm in length, ~25 nm in diameter | 50                                     | $3.9 \pm 0.2$ | this work         |
| Tm@Er@Ho@Pure nanorods                                 | ~245 nm in length, ~25 nm in diameter | 20                                     | $3.5 \pm 0.2$ |                   |
| Tm@Er@Ho nanorods                                      | ~190 nm in length, ~22 nm in diameter | 50                                     | $1.9 \pm 0.1$ |                   |
| Yb/Tm/Er/Ho co-doped $\text{KSc}_2\text{F}_7$ nanorods | ~245 nm in length, ~25 nm in diameter | 50                                     | $0.2 \pm 0.1$ |                   |
| $\text{NaYF}_4\text{:Yb/Er}$ bulk                      | $\gg 100$ nm                          | 20                                     | $3.0 \pm 0.3$ | Ref. <sup>6</sup> |
| $\text{NaYF}_4\text{:Yb/Er@NaYF}_4$ core-shell NPs     | ~30 nm                                | 150                                    | $0.3 \pm 0.1$ |                   |
| $\text{NaYF}_4\text{:Yb/Er}$ NPs                       | ~100 nm                               | 150                                    | $0.3 \pm 0.1$ |                   |
| $\text{LiYF}_4\text{:Er}$ NPs                          | 85                                    | 150 ( $\lambda_{\text{ex}} = 1500$ nm) | 1.2           | Ref. <sup>7</sup> |
| $\text{NaYF}_4\text{:Yb,Tm@NaYF}_4$ core-shell NPs     | 42                                    | 78                                     | 3.5           | Ref. <sup>8</sup> |
| $\text{NaYF}_4\text{:Yb,Tm}$ NPs                       | 33                                    | 3.8                                    | 0.45          | Ref. <sup>9</sup> |

|                                                                |     |     |             |                    |
|----------------------------------------------------------------|-----|-----|-------------|--------------------|
| LiLuF <sub>4</sub> :Yb,Er (or Tm) NPs                          | 28  | 127 | 0.11 (0.61) | Ref. <sup>2</sup>  |
| LiLuF <sub>4</sub> :Yb,Er@LiLuF <sub>4</sub><br>core-shell NPs | 50  | 127 | 5.0         |                    |
| LiLuF <sub>4</sub> :Yb,Tm@LiLuF <sub>4</sub><br>core-shell NPs | 50  | 127 | 7.6         |                    |
| NaGdF <sub>4</sub> :Yb/Er@NaYF <sub>4</sub><br>core-shell NPs  | ~13 | 50  | 0.89 ± 0.05 | Ref. <sup>10</sup> |

## References

- 1 J. E. Roberts, *J. Am. Chem. Soc.* 1961, **83**, 1087.
- 2 Y. Liu, S. Zhou, Z. Zhuo, R. Li, Z. Chen, M. Hong, X. Chen, *Chem. Sci.* 2016, **7**, 5013.
- 3 Y. S. Liu, D. T. Tu, H. M. Zhu, X. Y. Chen, *Chem. Soc. Rev.* 2013, **42**, 6924.
- 4 Y. Lu, J. Zhao, R. Zhang, Y. Liu, D. Liu, E. M. Goldys, X. Yang, P. Xi, A. Sunna, J. Lu, Y. Shi, R. C. Leif, Y. Huo, J. Shen, J. A. Piper, J. P. Robinson, D. Jin, *Nat. Photon.* 2014, **8**, 32.
- 5 Y. H. Zhang, L. X. Zhang, R. R. Deng, J. Tian, Y. Zong, D. Y. Jin, X. G. Liu, *J. Am. Chem. Soc.* 2014, **136**, 4893.
- 6 J. C. Boyer, F. C. J. M. van Veggel, *Nanoscale* 2010, **2**, 1417.
- 7 G. Y. Chen, T. Y. Ohulchanskyy, A. Kachynski, H. Agren, P. N. Prasad, *Acs Nano* 2011, **5**, 4981.
- 8 C. T. Xu, P. Svenmarker, H. C. Liu, X. Wu, M. E. Messing, L. R. Wallenberg, S. Andersson-Engels, *Acs Nano* 2012, **6**, 4788.
- 9 H. C. Liu, C. T. Xu, D. Lindgren, H. Y. Xie, D. Thomas, C. Gundlach, S. Andersson-Engels, *Nanoscale* 2013, **5**, 4770.
- 10 X. M. Li, R. Wang, F. Zhang, D. Y. Zhao, *Nano Lett.* 2014, **14**, 3634.
